# Supplementary material for: Cost-Effectiveness Analysis of Canagliflozin 300 mg Versus Dapagliflozin 10 mg Added to Metformin in Patients with Type 2 Diabetes in the United States
Source: Springer Nature journal article supplement (doi:10.1007/s13300-018-0371-y), 2018-02-06

**SUPPLEMENTARY MATERIALS**

**Supplementary Table S1. Key Patient Baseline Characteristics<sup>a</sup>**

| <b>Parameter</b>                  | <b>Pooled dual therapy<br/>canagliflozin studies<sup>b</sup></b> | <b>Real-world patient<br/>characteristics</b> |
|-----------------------------------|------------------------------------------------------------------|-----------------------------------------------|
| <b>Demographics</b>               |                                                                  |                                               |
| Age, y                            | 55.7 ± 9.3                                                       | 56.5 ± 11.8                                   |
| Male, %                           | 49.8                                                             | 51.8                                          |
| Duration of T2DM, y (range)       | 0.0-13.5                                                         | 0.0-13.5 <sup>c</sup>                         |
| <b>Biomarkers</b>                 |                                                                  |                                               |
| HbA1c, %                          | 7.9 ± 0.8                                                        | 7.4 ± 1.6                                     |
| SBP, mmHg                         | 129.1 ± 13.1                                                     | 129.1 ± 13.1 <sup>c</sup>                     |
| BMI, kg/m <sup>2</sup>            | 31.4 ± 5.8                                                       | 31.4 ± 5.8 <sup>c</sup>                       |
| Total cholesterol, mmol/L (mg/dL) | 4.8 ± 1.1 (187.0 ± 40.6)                                         | 4.9 ± 1.2 (189.6 ± 47.7)                      |
| LDL-C, mmol/L (mg/dL)             | 2.7 ± 0.9 (105.1 ± 34.6)                                         | 2.7 ± 0.9 (104.0 ± 34.7)                      |
| HDL-C, mmol/L (mg/dL)             | 1.2 ± 0.3 (46.2 ± 11.7)                                          | 1.2 ± 0.3 (45.2 ± 11.7)                       |
| Triglycerides, mmol/L (mg/dL)     | 2.1 ± 1.5 (183.4 ± 134.0)                                        | 2.3 ± 1.6 (202.4 ± 145.8)                     |
| eGFR, mL/min/1.73 m <sup>2</sup>  | 89.4 ± 18.6                                                      | 94.2 ± 20.6                                   |

BMI, body mass index; eGFR, estimated glomerular filtration rate; HDL-C, high-density lipoprotein cholesterol; LDL-C, low-density lipoprotein cholesterol; SBP, systolic blood pressure; SD, standard deviation; T2DM, type 2 diabetes mellitus.

<sup>a</sup>Data are mean ± SD unless otherwise indicated.

<sup>b</sup>Data sourced from a pooled analysis of the 52-week, head-to-head study of canagliflozin 100 and 300 mg versus sitagliptin 100 mg [51] and the 52-week, head-to-head study of canagliflozin 100 and 300 mg versus glimepiride [52].

<sup>c</sup>Data not available in database, so assumed to be the same as the pooled analysis of canagliflozin studies.

**Supplementary Table S2. Event-year and State Costs and QALY Utility Weight Inputs**

| <b>Parameter</b>                                                      | <b>Event-Year<br/>Cost, \$</b> | <b>State, Annualized<br/>Cost, \$</b> | <b>Utility<br/>decrement</b> |
|-----------------------------------------------------------------------|--------------------------------|---------------------------------------|------------------------------|
| <b>Patient characteristics</b>                                        |                                |                                       |                              |
| Age (per 10 y)                                                        | NA                             | NA                                    | -0.0235 [38]                 |
| Female                                                                | NA                             | NA                                    | -0.0930 [38]                 |
| Duration of T2DM (per 10 y)                                           | NA                             | NA                                    | -0.0163 [38]                 |
| Excess body weight (per kg/m <sup>2</sup> over 25 kg/m <sup>2</sup> ) | NA                             | NA                                    | -0.0061 [38]                 |
| <b>Macrovascular complications</b>                                    |                                |                                       |                              |
| MI                                                                    | 67,503.80                      | 2,277.03                              | -0.028 [38]                  |
| IHD                                                                   | 25,599.90                      | 2,277.03                              | -0.028 [38]                  |
| CHF                                                                   | 28,412.71                      | 2,277.03                              | -0.028 [38]                  |
| Stroke                                                                | 50,371.03                      | 18,584.62                             | -0.115 [38]                  |
| PVD                                                                   | 150.69                         | 150.69                                | -0.061 [38]                  |
| <b>Microvascular complications</b>                                    |                                |                                       |                              |
| Blindness                                                             | 3,422.73                       | 3,422.73                              | -0.057 [38]                  |
| <b>No nephropathy</b>                                                 |                                |                                       |                              |
| eGFR 60-89 mL/min/1.73 m <sup>2</sup>                                 | 0                              | 6,404.83                              | 0                            |
| eGFR 30-59 mL/min/1.73 m <sup>2</sup>                                 | 0                              | 8,531.41                              | -0.050 [39]                  |
| eGFR 15-29 mL/min/1.73 m <sup>2</sup>                                 | 0                              | 21,856.11                             | -0.070 [39]                  |
| eGFR <15 mL/min/1.73 m <sup>2</sup>                                   | 0                              | 21,856.11                             | -0.200 [39]                  |
| <b>Microalbuminuria</b>                                               |                                |                                       |                              |
| eGFR >90 mL/min/1.73 m <sup>2</sup>                                   | 94.48                          | 94.48                                 | 0                            |

|                                           |           |           |                |
|-------------------------------------------|-----------|-----------|----------------|
| eGFR 60-89 mL/min/1.73 m <sup>2</sup>     | 94.48     | 6,499.31  | 0              |
| eGFR 30-59 mL/min/1.73 m <sup>2</sup>     | 94.48     | 8,625.89  | 0              |
| eGFR <30 mL/min/1.73 m <sup>2</sup>       | 94.48     | 21,950.59 | 0              |
| Macroalbuminuria                          |           |           |                |
| eGFR >90 mL/min/1.73 m <sup>2</sup>       | 130.36    | 130.36    | -0.048 [38]    |
| eGFR 60-89 mL/min/1.73 m <sup>2</sup>     | 130.36    | 6,535.19  | -0.048 [38]    |
| eGFR 30-59 mL/min/1.73 m <sup>2</sup>     | 130.36    | 8,661.77  | -0.048 [38]    |
| eGFR <30 mL/min/1.73 m <sup>2</sup>       | 130.36    | 21,986.47 | -0.048 [38]    |
| ESRD, eGFR <15 mL/min/1.73 m <sup>2</sup> | 0         | 85,764.33 | 0 <sup>a</sup> |
| Symptomatic neuropathy                    | 1,050.02  | 1,316.71  | -0.084 [38]    |
| Diabetic foot ulcer                       | 2,567.64  | 987.67    | -0.170 [38]    |
| Lower extremity amputation                | 10,812.33 | 2,064.12  | -0.272 [38]    |
| Hypoglycemia                              |           |           |                |
| Non-severe symptomatic                    | 0         | NA        | -0.0035 [59]   |
| Severe                                    | 636.06    | NA        | -0.0118 [59]   |
| AEs                                       |           |           |                |
| Genital mycotic infection (male)          | 132.74    | NA        | -0.0046 [60]   |
| Genital mycotic infection (female)        | 132.74    | NA        | -0.0046 [60]   |
| Lower UTI                                 | 125.57    | NA        | -0.00123 [60]  |
| Upper UTI                                 | 136.34    | NA        | -0.00729 [60]  |
| Volume depletion–related AEs <sup>b</sup> | 83.71     | NA        | -0.005 [46]    |
| Osmotic diuresis–related AEs <sup>c</sup> | 88.50     | NA        | -0.005 [47]    |

---

AE, adverse event; CHF, congestive heart failure; eGFR, estimated glomerular filtration rate;

ESRD, end-stage renal disease; IHD, ischemic heart disease; MI, myocardial infarction; PVD,

peripheral vascular disease; QALY, quality-adjusted life-year; T2DM, type 2 diabetes mellitus; UTI, urinary tract infection.

<sup>a</sup>To avoid double counting as the disutility for ESRD is included in eGFR <15 mL/min/1.73 m<sup>2</sup> and no kidney damage.

<sup>b</sup>Utility decrement assumed to be equal to that for symptomatic hypoglycemia [46].

<sup>c</sup>Utility decrement assumed to be similar to that of overactive bladder [47].

**Supplementary Table S3. Sources of QALY Disutility in the Base Case**

| <b>Health state</b>                    | <b>Canagliflozin 300 mg</b> | <b>Dapagliflozin 10 mg</b> | <b>Difference</b> |
|----------------------------------------|-----------------------------|----------------------------|-------------------|
| Micro- and macrovascular complications |                             |                            |                   |
| MI                                     | 0.031                       | 0.031                      | 0.000             |
| IHD                                    | 0.030                       | 0.031                      | 0.000             |
| CHF                                    | 0.013                       | 0.013                      | 0.000             |
| Stroke                                 | 0.031                       | 0.031                      | -0.001            |
| Retinopathy                            | 0.018                       | 0.018                      | 0.000             |
| CKD                                    | 0.123                       | 0.122                      | 0.000             |
| Neuropathy                             | 0.349                       | 0.350                      | -0.001            |
| AEs                                    |                             |                            |                   |
| Hypoglycemia                           | 0.184                       | 0.222                      | -0.038            |
| Other AEs                              | 0.006                       | 0.007                      | -0.001            |
| Excess weight                          | 0.612                       | 0.631                      | -0.019            |
| Survival <sup>a</sup>                  |                             |                            | -0.018            |
| <b>Total<sup>b</sup></b>               |                             |                            | <b>-0.079</b>     |

AE, adverse event; CHF, congestive heart failure; CKD, chronic kidney disease; IHD, ischemic heart disease; MI, myocardial infarction; QALY, quality-adjusted life-year.

<sup>a</sup>For consistency with the other disutility measures, only the disutility associated with survival differences is reported (with the value of one intervention naturalized to 0).

<sup>b</sup>Note: This is measured as the sum of the incremental disutilities and equals the QALY differences reported earlier.

**Supplementary Figure S1. Biomarker evolution curves for (A) HbA1c, (B) SBP, and (C) BMI over 30 years.**

**A.**

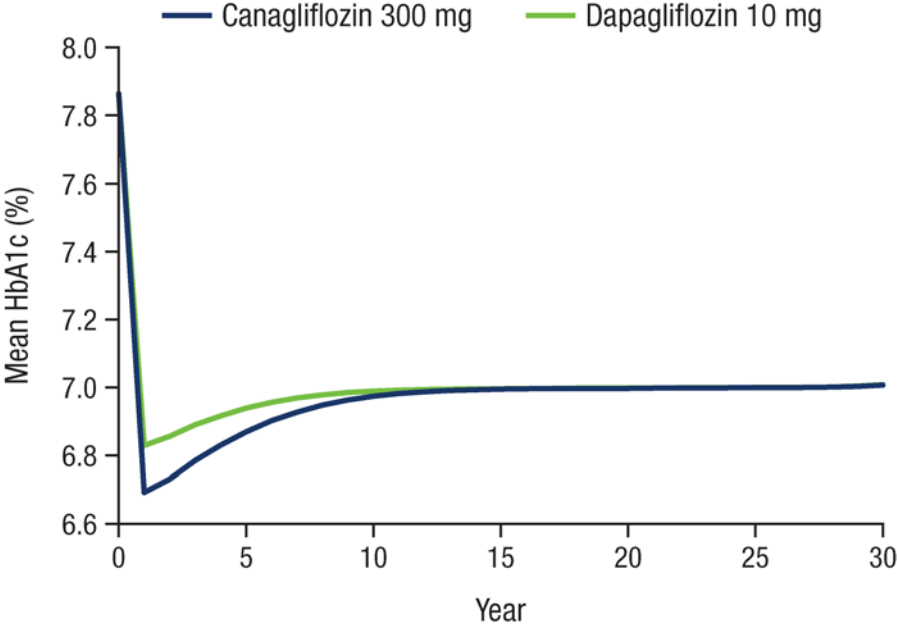

**B.**

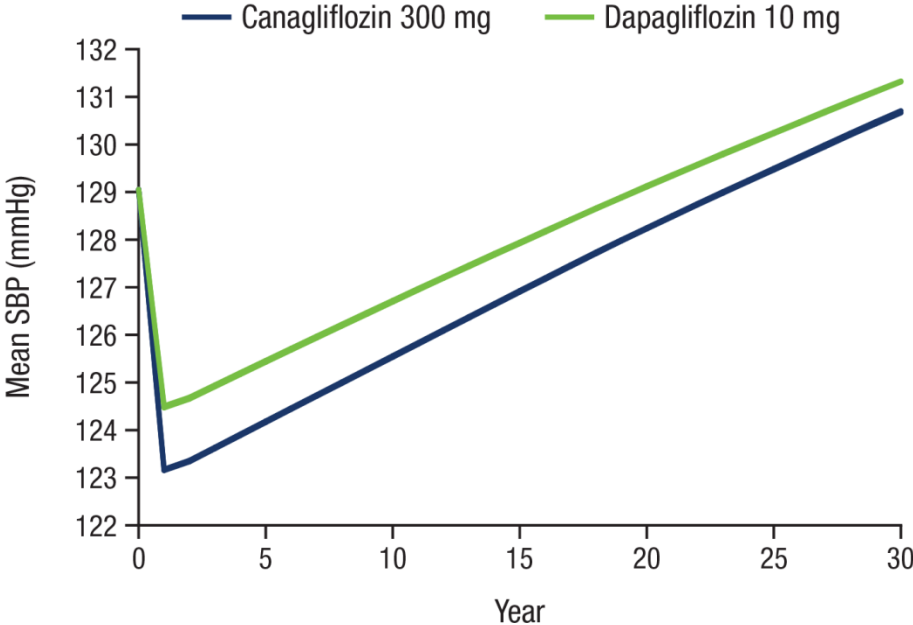

C.

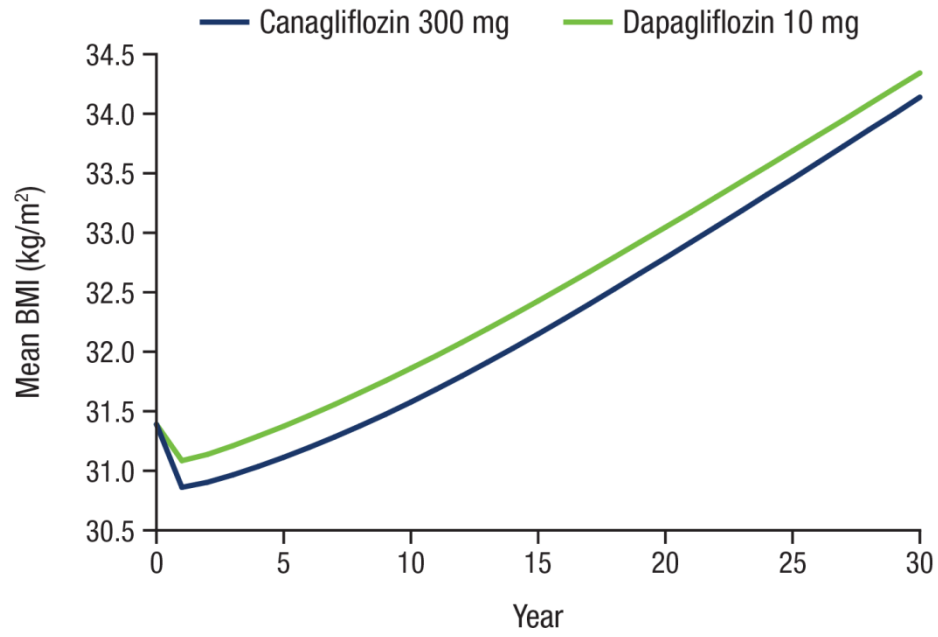

BMI, body mass index; SBP, systolic blood pressure.



**Supplementary Figure S2. Simulated insulin use with canagliflozin 300 mg versus dapagliflozin 10 mg over 30 years.**

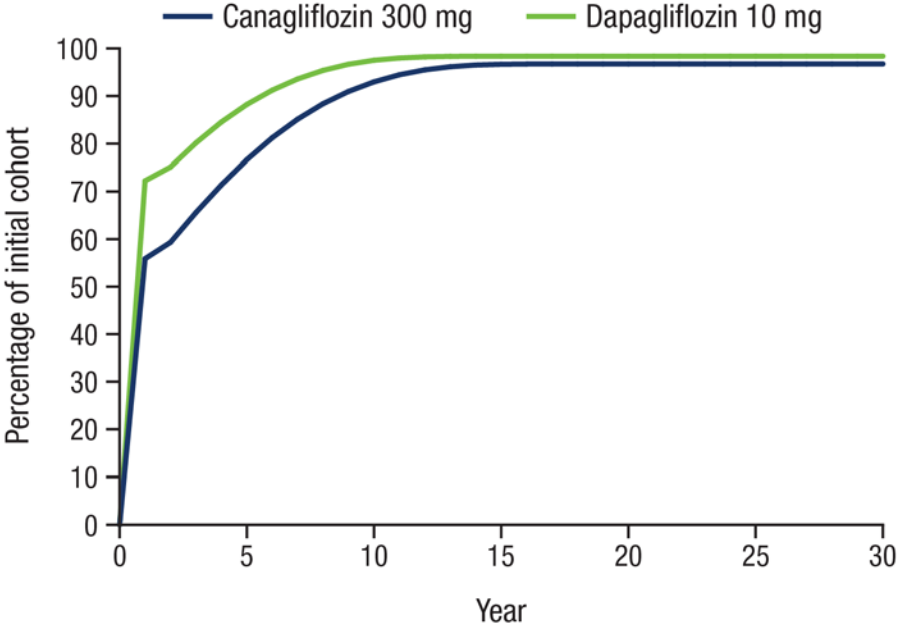

Supplement: MOESM1 [file 15442492]
